# Supplementary material for: Adjusted-GCS-Enhanced Machine-Learning Model Predicts 28-Day Mortality in ICU Stroke Patients
Source: Research Square preprint supplement (doi:10.21203/rs.3.rs-6864693/v1), 2025-07-07
Supplement: Supplementary file 1 [file caf6ad0b594a7ee22f10ef0a.docx]

Table S1. Baseline characteristics of training set and testing set

| **Variables** | **Overall**  **(n=12625)** | **Train**  **(n=8838)** | **Test**  **(n=3787)** | **p** |
| --- | --- | --- | --- | --- |
| Age, median [IQR] | 69.34 [58.32, 80.02] | 69.28 [58.33, 80.01] | 69.48 [58.30, 80.06] | 0.823 |
| Gender, n (%) |  |  |  |  |
| Female | 5993 (47.47) | 4212 (47.66) | 1781 (47.03) | 0.517 |
| Male | 6632 (52.53) | 4626 (52.34) | 2006 (52.97) |  |
| Race, n (%) |  |  |  |  |
| White | 7965 (63.09) | 5597 (63.33) | 2368 (62.53) | 0.147 |
| Black African American | 1635 (12.95) | 1143 (12.93) | 492 (12.99) |  |
| Asian | 429 (3.40) | 279 (3.16) | 150 (3.96) |  |
| Hispanic Latino | 517 (4.10) | 353 (3.99) | 164 (4.33) |  |
| Other | 645 (5.11) | 468 (5.30) | 177 (4.67) |  |
| Unknown | 1434 (11.36) | 998 (11.29) | 436 (11.51) |  |
| Heart Rate, median [IQR] | 82.00 [71.00, 95.00] | 82.00 [71.00, 95.00] | 82.00 [71.00, 95.00] | 0.992 |
| Respiratory Rate, median [IQR] | 18.00 [15.00, 22.00] | 18.00 [15.00, 22.00] | 18.00 [15.00, 22.00] | 0.629 |
| Temperature, median [IQR] | 36.78 [36.44, 37.06] | 36.78 [36.44, 37.06] | 36.78 [36.50, 37.06] | 0.522 |
| SBP, median [IQR] | 133.00 [117.00, 150.00] | 133.00 [117.00, 150.00] | 133.00 [116.25, 150.00] | 0.535 |
| SPO2, median [IQR] | 98.00 [96.00, 100.00] | 98.00 [96.00, 100.00] | 98.00 [96.00, 100.00] | 0.379 |
|  |  |  |  |  |
| Hematocrit, median [IQR] | 36.50 [31.20, 40.70] | 36.50 [31.20, 40.70] | 36.32 [30.92, 40.70] | 0.667 |
| Hemoglobin, median [IQR] | 12.00 [10.10, 13.60] | 12.00 [10.20, 13.60] | 12.00 [10.10, 13.60] | 0.602 |
| WBC, median [IQR] | 10.10 [7.50, 13.70] | 10.20 [7.50, 13.70] | 10.10 [7.50, 13.60] | 0.420 |
|  |  |  |  |  |
| Platelet, median [IQR] | 212.00 [161.00, 271.00] | 212.00 [161.00, 271.00] | 211.00 [160.90, 269.00] | 0.482 |
| Potassium, median [IQR] | 4.10 [3.70, 4.50] | 4.10 [3.70, 4.50] | 4.10 [3.70, 4.50] | 0.968 |
| Sodium, median [IQR] | 139.00 [136.00, 141.00] | 139.00 [136.00, 141.00] | 139.00 [136.00, 141.00] | 0.555 |
| Creatinine, median [IQR] | 1.00 [0.70, 1.30] | 1.00 [0.70, 1.30] | 1.00 [0.70, 1.30] | 0.773 |
| BUN, median [IQR] | 18.00 [13.00, 27.00] | 18.00 [13.00, 27.00] | 18.00 [13.00, 27.00] | 0.288 |
| Glucose, median [IQR] | 128.00 [106.00, 166.00] | 129.00 [106.00, 167.00] | 127.00 [105.00, 165.00] | 0.102 |
| Anion Gap, median [IQR] | 15.00 [13.00, 17.00] | 15.00 [13.00, 17.00] | 14.00 [12.00, 17.00] | 0.062 |
| Bicarbonate, median [IQR] | 23.00 [21.00, 25.00] | 23.00 [21.00, 25.00] | 23.00 [21.00, 25.00] | 0.228 |
| Chloride, median [IQR] | 103.00 [100.00, 106.00] | 103.00 [100.00, 106.00] | 103.00 [100.00, 106.00] | 0.335 |
| GCS 48h Median, median [IQR] | 15.00 [14.00, 15.00] | 15.00 [14.00, 15.00] | 15.00 [14.00, 15.00] | 0.663 |
| GCS Adjust48h Median, median [IQR] | 14.00 [12.00, 15.00] | 14.00 [12.00, 15.00] | 14.00 [12.00, 15.00] | 0.091 |
| Charlson Comorbidity Index, median [IQR] | 6.00 [4.00, 8.00] | 6.00 [4.00, 8.00] | 6.00 [4.00, 8.00] | 0.906 |
| Sofa, median [IQR] | 3.00 [2.00, 5.00] | 3.00 [2.00, 5.00] | 3.00 [2.00, 5.00] | 0.138 |
| LODS, median [IQR] | 3.00 [2.00, 5.00] | 3.00 [2.00, 5.00] | 3.00 [2.00, 5.00] | 0.042 |
| SAPSII, median [IQR] | 33.00 [26.00, 42.00] | 33.00 [26.00, 42.00] | 33.00 [26.00, 41.00] | 0.070 |
| Disease Type, n (%) |  |  |  |  |
| Hemorrhagic | 5897 (46.71) | 4110 (46.50) | 1787 (47.19) | 0.610 |
| Ischemic | 5044 (39.95) | 3556 (40.24) | 1488 (39.29) |  |
| Mixed | 1684 (13.34) | 1172 (13.26) | 512 (13.52) |  |
| AKI, n (%) |  |  |  |  |
| 0 | 5477 (43.38) | 3816 (43.18) | 1661 (43.86) | 0.649 |
| 1 | 1759 (13.93) | 1253 (14.18) | 506 (13.36) |  |
| 2 | 3392 (26.87) | 2377 (26.90) | 1015 (26.80) |  |
| 3 | 1997 (15.82) | 1392 (15.75) | 605 (15.98) |  |
| Myocardial Infarct, n (%) |  |  |  |  |
| No | 10750 (85.15) | 7528 (85.18) | 3222 (85.08) | 0.888 |
| Yes | 1875 (14.85) | 1310 (14.82) | 565 (14.92) |  |
| Congestive Heart Failure, n (%) |  |  |  |  |
| No | 9462 (74.95) | 6616 (74.86) | 2846 (75.15) | 0.727 |
| Yes | 3163 (25.05) | 2222 (25.14) | 941 (24.85) |  |
| Peripheral Vascular Disease, n (%) |  |  |  |  |
| No | 11122 (88.10) | 7802 (88.28) | 3320 (87.67) | 0.332 |
| Yes | 1503 (11.90) | 1036 (11.72) | 467 (12.33) |  |
| Dementia, n (%) |  |  |  |  |
| No | 11881 (94.11) | 8302 (93.94) | 3579 (94.51) | 0.211 |
| Yes | 744 (5.89) | 536 (6.06) | 208 (5.49) |  |
| Chronic Pulmonary Disease, n (%) |  |  |  |  |
| No | 10292 (81.52) | 7227 (81.77) | 3065 (80.93) | 0.267 |
| Yes | 2333 (18.48) | 1611 (18.23) | 722 (19.07) |  |
| Mild Liver Disease, n (%) |  |  |  |  |
| No | 11704 (92.70) | 8199 (92.77) | 3505 (92.55) | 0.668 |
| Yes | 921 (7.30) | 639 (7.23) | 282 (7.45) |  |
| Diabetes, n (%) |  |  |  |  |
| No | 8625 (68.32) | 6024 (68.16) | 2601 (68.68) | 0.563 |
| Yes | 4000 (31.68) | 2814 (31.84) | 1186 (31.32) |  |
| Paraplegia, n (%) |  |  |  |  |
| No | 9358 (74.12) | 6559 (74.21) | 2799 (73.91) | 0.722 |
| Yes | 3267 (25.88) | 2279 (25.79) | 988 (26.09) |  |
| Renal Disease, n (%) |  |  |  |  |
| No | 9879 (78.25) | 6912 (78.21) | 2967 (78.35) | 0.862 |
| Yes | 2746 (21.75) | 1926 (21.79) | 820 (21.65) |  |
| Malignant Cancer, n (%) |  |  |  |  |
| No | 11323 (89.69) | 7924 (89.66) | 3399 (89.75) | 0.871 |
| Yes | 1302 (10.31) | 914 (10.34) | 388 (10.25) |  |
| Sepsis, n (%) |  |  |  |  |
| No | 7374 (58.41) | 5120 (57.93) | 2254 (59.52) | 0.097 |
| Yes | 5251 (41.59) | 3718 (42.07) | 1533 (40.48) |  |
| Dialysis Present, n (%) |  |  |  |  |
| No | 11817 (93.60) | 8274 (93.62) | 3543 (93.56) | 0.897 |
| Yes | 808 (6.40) | 564 (6.38) | 244 (6.44) |  |
| Ventilation, n (%) |  |  |  |  |
| No | 8691 (68.84) | 6067 (68.65) | 2624 (69.29) | 0.475 |
| Yes | 3934 (31.16) | 2771 (31.35) | 1163 (30.71) |  |
| Norepinephrine, n (%) |  |  |  |  |
| No | 10939 (86.65) | 7666 (86.74) | 3273 (86.43) | 0.637 |
| Yes | 1686 (13.35) | 1172 (13.26) | 514 (13.57) |  |
| Status 28d, n (%) |  |  |  |  |
| Survivors | 10502 (83.18) | 7354 (83.21) | 3148 (83.13) | 0.910 |
| Non-Survivors | 2123 (16.82) | 1484 (16.79) | 639 (16.87) |  |

Continuous variables are presented as median (interquartile range), and categorical variables are expressed as numbers (%). Wilcoxon rank-sum test or Chi-square test was used as appropriate.

IQR, Interquartile Range; AKI, acute kidney injury; WBC, white blood cell; BUN, blood urea nitrogen; SBP, systolic blood pressure; SPO2, pulse blood oxygen saturation; SAPSII, simplified acute physiology score; SOFA, sequential organ failure assessment; LODS, logistic organ dysfunction system
